# Supplementary material for: One-dimensional van der Waals transition metal chalcogenide as an anode material for advanced lithium-ion batteries
Source: Royal Society of Chemistry journal article supplement (doi:10.1039/d3ta06867f), 2024-01-01
Supplement: d3ta06867f1.pdf [file d3ta06867f1.pdf]

## Supporting Information

# One-dimensional van der Waals Transition Metal Chalcogenide as an Anode Material for Advanced Lithium-ion Batteries

*Woosung Choi<sup>1,†</sup>, Seungbae Oh<sup>2,†</sup>, Sunhyun Hwang<sup>1,†</sup>, Sudong Chae<sup>2</sup>, Hyunyoung Park<sup>1</sup>,  
Wontae Lee<sup>1</sup>, Chaeheon Woo<sup>2</sup>, Xue Dong<sup>5</sup>, Kyung Hwan Choi<sup>5</sup>, Jungyoon Ahn<sup>2</sup>, Yeongjin  
Kim<sup>2</sup>, Xiaojie Zhang<sup>2</sup>, Jinsu Kang<sup>2</sup>, Hyeon-Seok Bang<sup>2</sup>, Jiho Jeon<sup>5</sup>, Hyung-Suk Oh<sup>3,4</sup>,  
Jongsoon Kim<sup>1,6</sup>, Jae-Young Choi<sup>2,3,5,\*</sup>, and Won-Sub Yoon<sup>1,6,\*</sup>.*

<sup>1</sup>Department of Energy Science, Sungkyunkwan University, Suwon 16419, Republic of Korea.

<sup>2</sup>School of Advanced Materials Science & Engineering, Sungkyunkwan University, Suwon 16419, Republic of Korea.

<sup>3</sup>School of Advanced Materials Science & Engineering and KIST-SKKU Carbon-Neutral Research Center, Sungkyunkwan University, Suwon 16419, Republic of Korea

<sup>4</sup>Clean Energy Research Center, Korea Institute of Science and Technology (KIST), Seoul 02792, Republic of Korea

<sup>5</sup>SKKU Advanced Institute of Nanotechnology (SAINT), Sungkyunkwan University, Suwon  
16419, Republic of Korea

<sup>6</sup>SKKU Institute of Energy Science and Technology (SIEST), Sungkyunkwan University,  
Suwon 16419, Republic of Korea

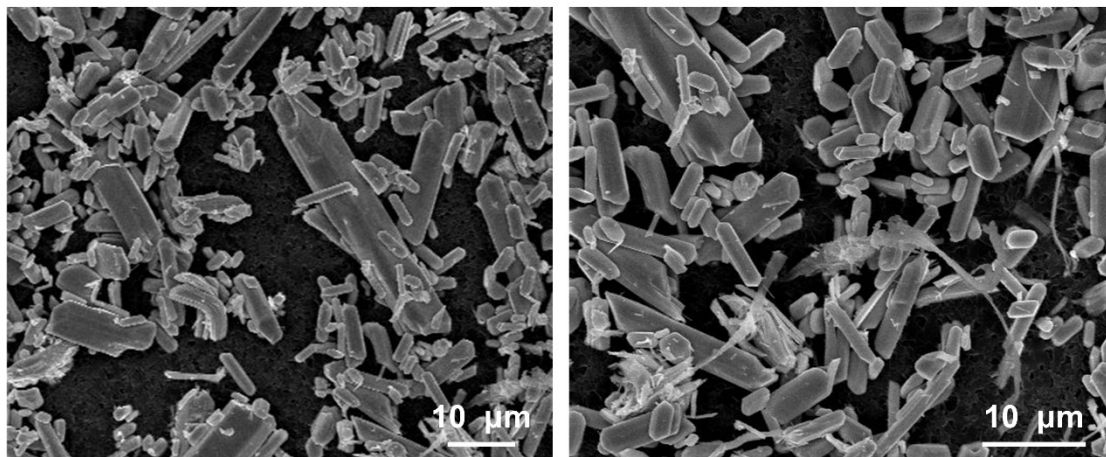

**Fig. S1** SEM images of obtained 1D vdW Nb<sub>2</sub>Se<sub>9</sub> powder.

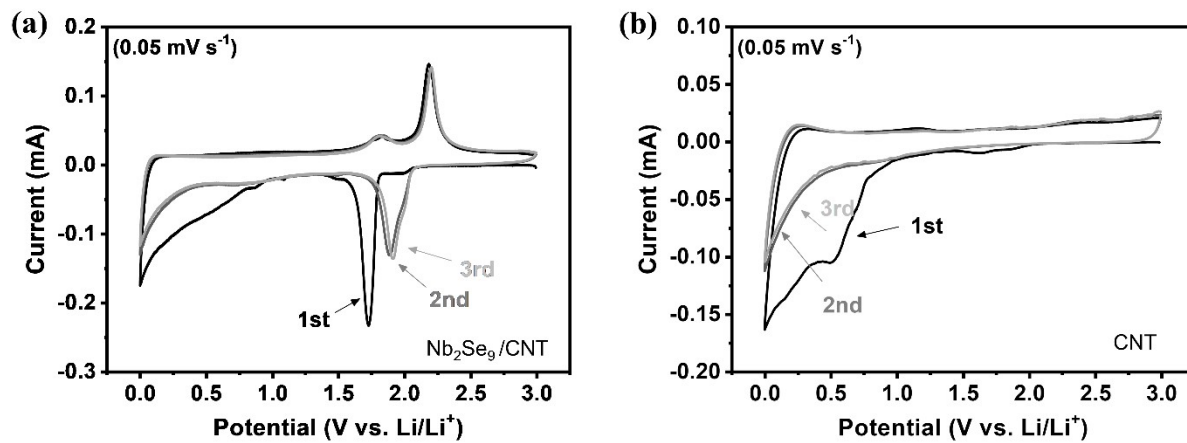

Fig. S2 CV data of  $\text{Nb}_2\text{Se}_9/\text{CNT}$  and  $\text{CNT}$  electrodes upon three cycles

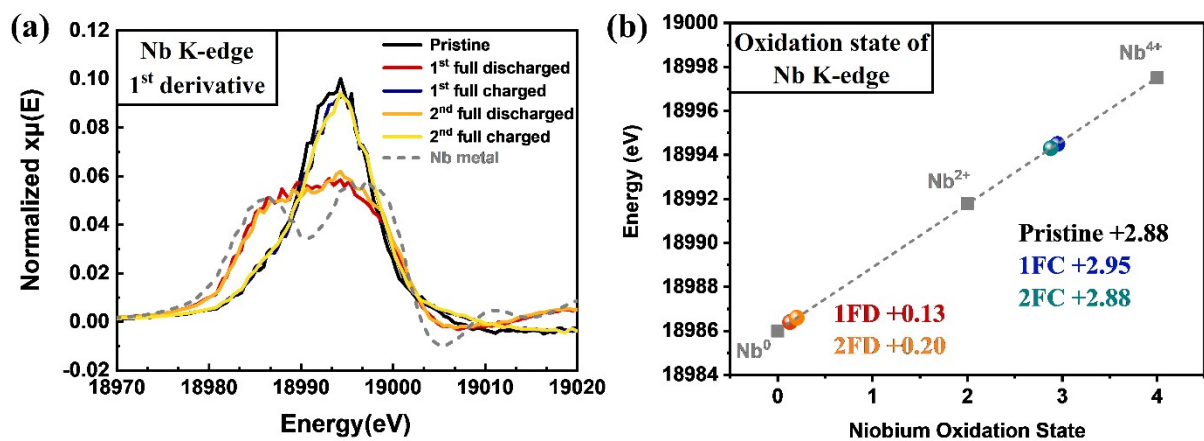

**Fig. S3** (a) First derivative spectra of Nb K-edge obtained from Fig. 5b, and the (b) determined average valence state of Nb at pristine, 1FD, 1FC, 2FD, and 2FC with  $Nb^0$ ,  $Nb^{2+}$ , and  $Nb^{4+}$  as reference data.

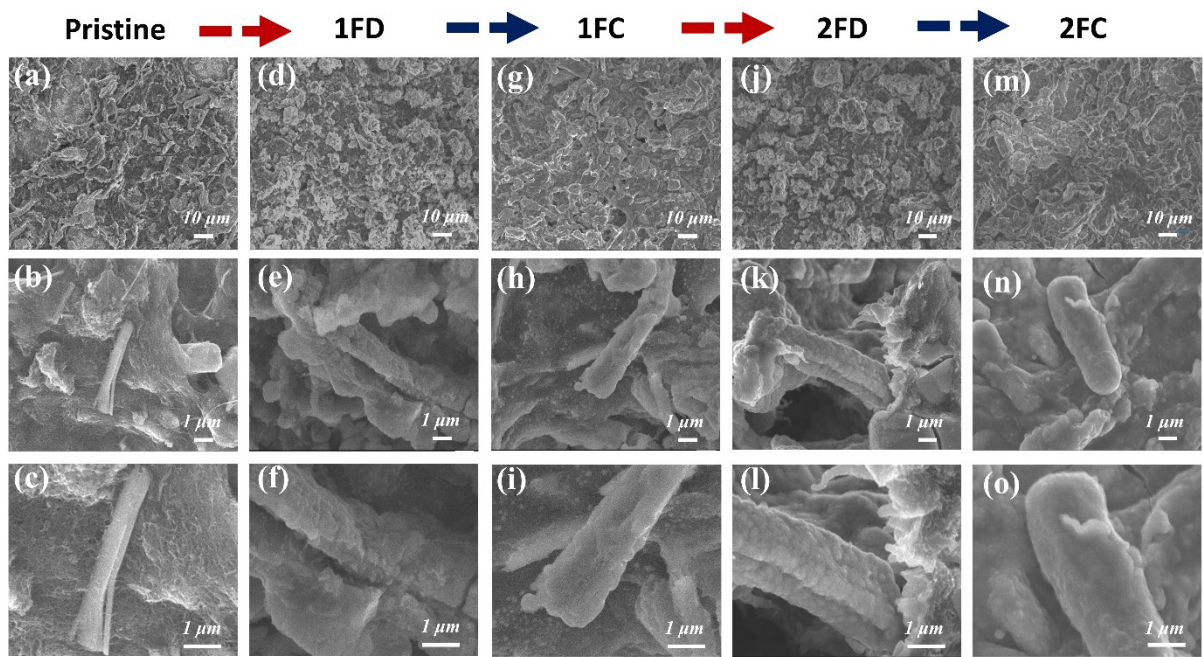

**Fig. S4** SEM images of 1D vdW Nb<sub>2</sub>Se<sub>9</sub> electrode materials at (a–c) pristine, (d–f) first discharge, (g–i) first charge, (j–l) second discharge, and (m–o) second charge.
